# Supplementary material
Source: publisher figshare collection journal article supplement (https://rs.figshare.com/ndownloader/files/17842625)
Supplement: Supplementary file 1 [file 17842625]

50	0.1	0.01	1	-1	0.03	0.04	0.4	0	5	1	1849.1	0.2855
50	0.15	0.05	1	-1	0.03	0.04	0.4	0.1	5	1	1920.3	0.3134
50	0.55	0.55	1	-1	0.03	0.04	0.4	0.2	5	1	3642.6	0.3498
50	0.95	0.95	1	-1	0.03	0.04	0.4	0.3	5	1	23319	0.3812
50	0.95	0.95	1	-1	0.03	0.04	0.4	0.4	5	1	23178	0.3785
50	0.95	0.95	1	-1	0.03	0.04	0.4	0.5	5	1	23475	0.3823
50	0.85	0.95	1	-1	0.03	0.04	0.4	0.6	5	1	12771	0.3434
50	0.99	0.99	1	-1	0.03	0.04	0.4	0.7	5	1	87909	0.3426
50	0.99	0.99	1	-1	0.03	0.04	0.4	0.8	5	1	88052	0.3472
50	0.99	0.99	1	-1	0.03	0.04	0.4	0.9	5	1	88831	0.3532
